# Supplementary material for: Vector species-specific association between natural Wolbachia infections and avian malaria in black fly populations
Source: PubMed Central journal article supplement (PMC5843599; doi:10.1038/s41598-018-22550-z), 2018-03-08
Supplement: 41598_2018_22550_MOESM1_ESM.pdf [file 41598_2018_22550_MOESM1_ESM.pdf]

## Supplementary Material

### Vector species-specific association between natural *Wolbachia* infections and avian malaria in black fly populations

Luke Woodford<sup>1,2</sup>, Giovanni Bianco<sup>1</sup>, Yoana Ivanova<sup>1</sup>, Maeve Dale<sup>1</sup>, Kathryn Elmer<sup>1</sup>, Fiona Rae<sup>1</sup>, Stephen D. Larcombe<sup>1</sup>, Barbara Helm<sup>1</sup>, Heather M. Ferguson<sup>1</sup> and Francesco Baldini<sup>1\*</sup>

<sup>1</sup>Institute of Biodiversity, Animal Health and Comparative Medicine, University of Glasgow, United Kingdom

<sup>2</sup>Department of Biomolecular Sciences, School of Biology, University of St Andrews, United Kingdom

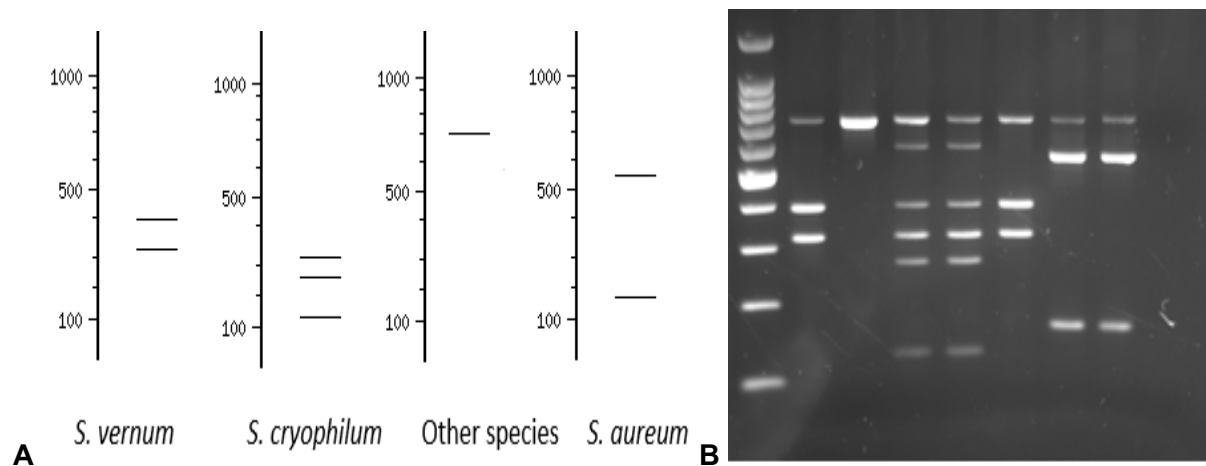

**Supplementary Figure S1: A)** Expected RFLP fragment sizes for each characterized *Simulium* species. Each band represents a fragment produced from the digestion. The marker column to the left of each set of fragments indicates the approximate base pair sizes. **B)** RFLP fragments shown by gel electrophoresis analysis (sample order - lane 1 = 50bp ladder, lane 2 and 6 = *S. venum*, lane 3 = *S. intermedium* (or other), lane 4 and 5 = *S. cryophilum*, lane 7 and 8 = *S. aureum*). Some non-digested amplicon is visible in all samples, although a clear specific pattern can be determined for all species tested.

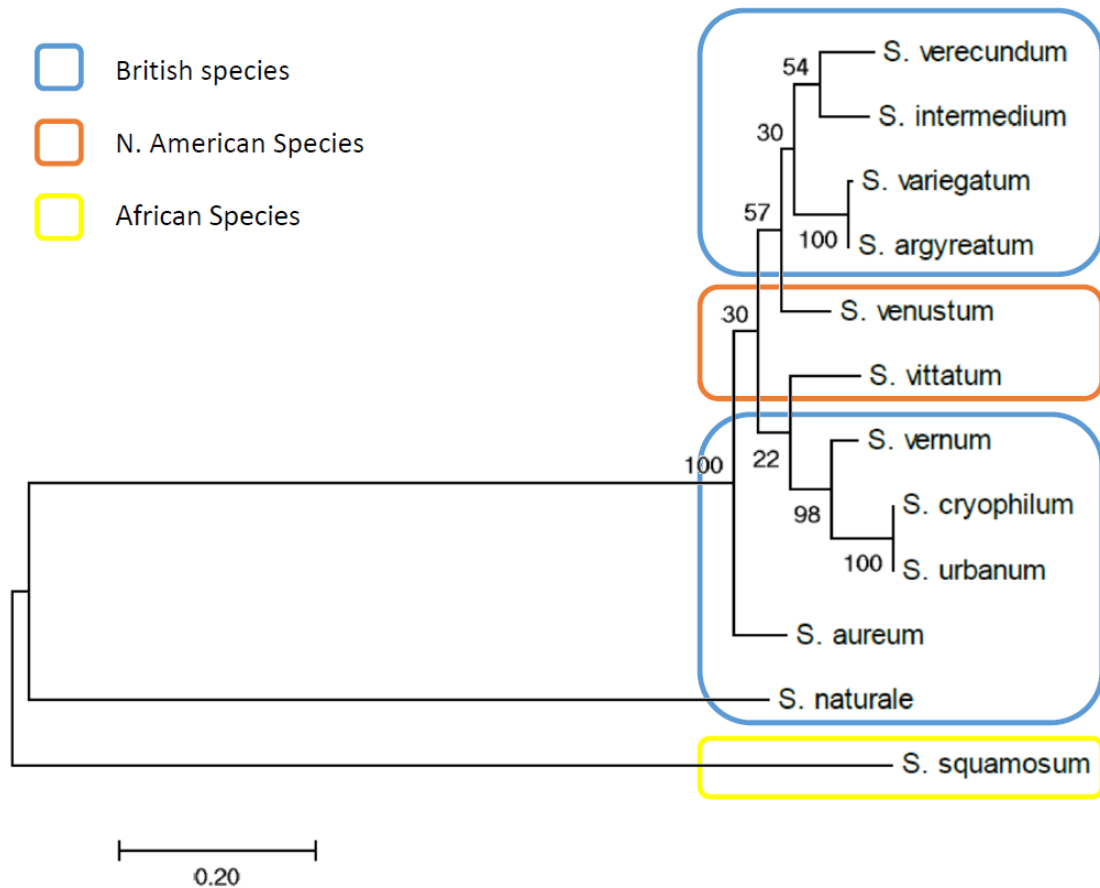

**Supplementary Figure S2 - Molecular phylogenetic analysis of all *Simulium* species identified using Maximum Likelihood method.** Phylogenetic analysis based on the Tamura 3-parameter model <sup>1</sup>. The tree with the highest log likelihood (-2916.5242) is shown. The percentage of trees in which the associated taxa clustered together is shown next to the branches. Initial tree(s) for the heuristic search were obtained automatically by applying Neighbor-Join and BioNJ algorithms to a matrix of pairwise distances estimated using the Maximum Composite Likelihood (MCL) approach, and then selecting the topology with superior log likelihood value. The tree is drawn to scale, with branch lengths measured in the number of substitutions per site. The analysis involved 12 nucleotide sequences. There were a total of 449 positions in the final dataset. Evolutionary analyses were conducted in MEGA7 <sup>2</sup>.

## Supplement Table S1

Best MalAvi database BLAST hits for *Leucocytozoon* haplotypes found in black flies and blue tits (*Cyanistes caeruleus*)<sup>3</sup> in the same season and location in Scotland.

| Haplotype | Detected in                | Length bp | Top MALAVI hit | E-value | % identity |
|-----------|----------------------------|-----------|----------------|---------|------------|
| SIM01     | <i>S.cryophylum</i>        | 372       | PERATE04       | 0       | 100        |
| SIM01     | <i>S.cryophylum</i>        | 96        | PERATE04       | 2e-46   | 100        |
| SIM01     | <i>S.aureum</i>            | 123       | PERATE04       | 2e-62   | 100        |
| SIM01     | <i>S.aureum</i>            | 174       | PERATE0        | 2e-89   | 100        |
| SIM01     | <i>S.vernum</i>            | 174       | PERATE04       | 2e-89   | 100        |
| SIM01     | <i>S.cryophylum</i>        | 162       | PERATE04       | 7e-83   | 100        |
| SIM01     | <i>S.aureum</i>            | 96        | PERATE04       | 2e-46   | 100        |
| SIM02     | <i>S.aureum</i>            | 111       | WW6            | 1e-54   | 100        |
| SIM02     | <i>S.cryophylum</i>        | 82        | WW6            | 1e-38   | 100        |
| SIM02     | <i>S.cryophylum</i>        | 297       | WW6            | 8e-85   | 100        |
| SIM02     | <i>S.aureum</i>            | 132       | WW6            | 4e-60   | 100        |
| SIM02     | <i>S.aureum</i>            | 120       | WW6            | 1e-59   | 100        |
| SIM02     | <i>S.vernum</i>            | 126       | WW6            | 6e-63   | 100        |
| SIM03     | <i>S.cryophylum</i>        | 135       | NEVE01         | 6e-68   | 100        |
| SIM03     | <i>S.cryophylum</i>        | 102       | NEVE01         | 1e-49   | 100        |
| SIM03     | <i>S.cryophylum</i>        | 123       | NEVE01         | 3e-61   | 100        |
| SIM03     | <i>S.cryophylum</i>        | 123       | NEVE01         | 3e-61   | 100        |
| SIM03     | <i>S.cryophylum</i>        | 432       | NEVE01         | 0       | 100        |
| SIM04     | <i>S.aureum</i>            | 123       | MTUR2          | 3e-61   | 100        |
| SIM04     | <i>S.cryophylum</i>        | 102       | MTUR2          | 1e-49   | 100        |
|           |                            |           |                |         |            |
| SIM05     | <i>S.aureum</i>            | 471       | PARUS4         | 0       | 100        |
| SIM05     | <i>S.aureum</i>            | 438       | PARUS4         | 0       | 100        |
| SIM06     | <i>S.vernum</i>            | 471       | PARUS14        | 0       | 99         |
| SIM07     | <i>S.cryophylum</i>        | 471       | PARUS21        | 0       | 100        |
| SIM08     | <i>S.cryophylum</i>        | 99        | SERSER04       | 4e-48   | 100        |
| SIM09     | <i>S.vernum</i>            | 98        | ZOCAP05        | 3e-49   | 100        |
| SIM10     | <i>S.vernum</i>            | 81        | TUPHI06        | 7e-35   | 100        |
| SIM11     | <i>S.aureum</i>            | 141       | TRPIP2         | 3e-75   | 100        |
| SIM11     | <i>S.cryophylum</i>        | 75        | TRPIP2         | 7e-35   | 100        |
| SIM12     | <i>S.aureum</i>            | 267       | AEMO02         | 5e-136  | 100        |
| SIM13     | <i>S.cryophilum</i>        | 454       | COLIV04        | 0       | 100        |
| SIM14     | <i>S.cryophylum</i>        | 180       | GAGLA06        | 8e-93   | 100        |
| SIM14     | <i>S.vernum</i>            | 189       | GAGLA06        | 4e-96   | 100        |
|           | <i>Cyanistes caeruleus</i> | 296       | PARUS20        | 4e-157  | 100        |
| SIM05     | <i>Cyanistes caeruleus</i> | 451       | PARUS4         | 0       | 100        |
| SIM07     | <i>Cyanistes caeruleus</i> | 178       | PARUS21        | 9e-92   | 100        |

|          |                            |     |          |        |     |
|----------|----------------------------|-----|----------|--------|-----|
| TFUS11   | <i>Cyanistes caeruleus</i> | 123 | TFUS11   | 2e-61  | 100 |
| SYAT20   | <i>Cyanistes caeruleus</i> | 265 | SYAT20   | 6e-140 | 100 |
| XANMAC02 | <i>Cyanistes caeruleus</i> | 98  | XANMAC02 | 1e-47  | 100 |
| SIM01    | <i>Cyanistes caeruleus</i> | 84  | PERATE04 | 7e-40  | 100 |
| PARUS59  | <i>Cyanistes caeruleus</i> | 221 | PARUS59  | 1e-115 | 100 |
| SIM06    | <i>Cyanistes caeruleus</i> | 218 | PARUS14  | 3e-112 | 99  |
| PARUS50  | <i>Cyanistes caeruleus</i> | 395 | PARUS50  | 0      | 100 |

**Supplement Table S2:** Total cut sites and the fragment sizes produced for each *Simulium* species. Buffer 2.1 was considered optimal for both enzymes and the same incubation temperature was required for enzyme activity.

| Enzyme         | Number of fragments per species |                      |                       |                  | Buffer 2.1 activity | Incubation temp (°C) |
|----------------|---------------------------------|----------------------|-----------------------|------------------|---------------------|----------------------|
|                | <i>S. vernum</i>                | <i>S. cryophilum</i> | <i>S. intermedium</i> | <i>S. aureum</i> |                     |                      |
| NheI           | I                               | II                   | -                     | -                | 100%                | 37                   |
| NsiI           | -                               | -                    | -                     | I                | 75%                 | 37                   |
| Cut sizes (bp) | 391/318                         | 318/263/128          | 709                   | 545/164          | N/A                 | N/A                  |

**Supplement Table S3:** List of Single nucleotide polymorphisms (SNPs) identified in the *Wolbachia* MLST genes from three main black fly (*Simulium*) species.

|             | <i>S. cryophilum</i>            | <i>S. aureum</i> | <i>S. vernum</i>                                                    |
|-------------|---------------------------------|------------------|---------------------------------------------------------------------|
| Gene        | Single nucleotide polymorphisms |                  |                                                                     |
| <i>coxA</i> | none                            | none             | C56T, G134A, T190C, A193G, T277C, C280T, A283G, C298T, T333C, A397G |
| <i>fbpA</i> | none                            | none             | T88C, G129A, G340A, T350C                                           |
| <i>ftsZ</i> | T341C, C383T, T394C             | none             | none                                                                |
| <i>gatB</i> | none                            | none             | none                                                                |
| <i>hcpA</i> | none                            | A314C            | none                                                                |

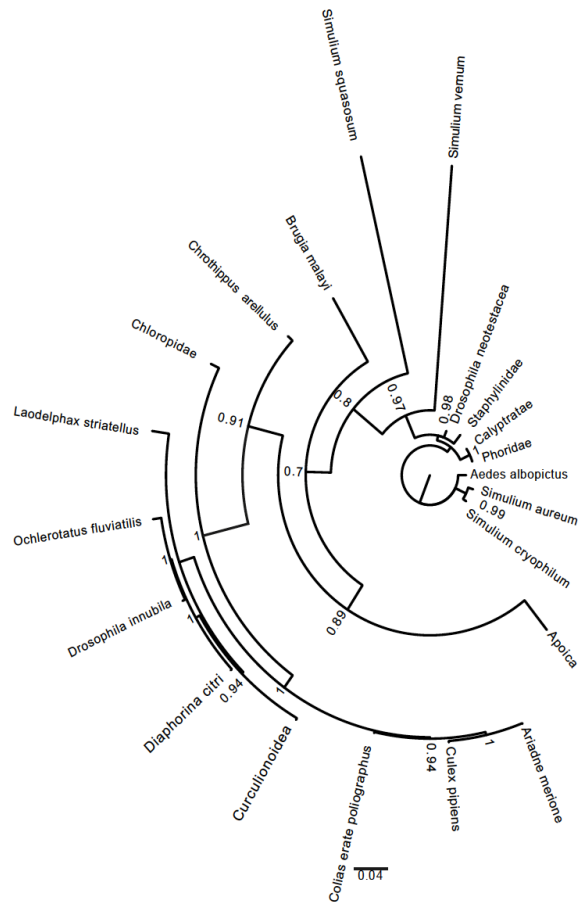

**Supplementary Figure S3:** Phylogenetic analysis of *Wolbachia* MLST sequences representative of individual alleles identified in the three main black fly species in relation with other *Wolbachia* strains.

**Supplementary Table S4** - number of samples which tested positive for *Leucocytozoon* (L) and *Wolbachia* (W) per species (percentage of infected per species shown in brackets).

| Month | <i>S. aureum</i> |         |         | <i>S. vernum</i> |         |         | <i>S. cryophilum</i> |         |         | Other species |       |         |
|-------|------------------|---------|---------|------------------|---------|---------|----------------------|---------|---------|---------------|-------|---------|
|       | Total            | L       | W       | Total            | L       | W       | Total                | L       | W       | Total         | L     | W       |
| May   | 0                | 0       | 0       | 3                | 0       | 0       | 12                   | 3 (25)  | 4 (33)  | 0             | 0     | 0       |
| June  | 1                | 0       | 1 (100) | 13               | 1 (8)   | 5 (38)  | 58                   | 21 (36) | 19 (33) | 3             | 0     | 1 (33)  |
| July  | 0                | 0       | 0       | 82               | 22 (27) | 19 (23) | 34                   | 14 (41) | 7 (21)  | 1             | 0     | 1 (100) |
| Aug.  | 23               | 3 (13)  | 7 (30)  | 38               | 4 (11)  | 7 (18)  | 4                    | 0       | 1 (25)  | 0             | 0     | 0       |
| Sept. | 85               | 22 (26) | 13 (15) | 1                | 0       | 0       | 1                    | 0       | 1 (100) | 1             | 0     | 0       |
| Oct.  | 6                | 2 (33)  | 3 (50)  | 0                | 0       | 0       | 1                    | 1 (100) | 1 (100) | 3             | 0     | 2 (66)  |
| Total | 115              | 27 (23) | 24 (20) | 137              | 27 (19) | 31 (23) | 110                  | 39 (35) | 33 (30) | 8             | 0 (0) | 4 (50)  |

## References:

1. Tamura, K. Estimation of the number of nucleotide substitutions when there are strong transition-transversion and G+C-content biases. *Mol. Biol. Evol.* **9**, 678–687 (1992).
2. Kumar, S., Stecher, G. & Tamura, K. MEGA7: Molecular Evolutionary Genetics Analysis version 7.0 for bigger datasets. *Mol. Biol. Evol.* msw054 (2016). doi:10.1093/molbev/msw054
3. Capilla-Lasheras, P. *et al.* Elevated Immune Gene Expression Is Associated with Poor Reproductive Success of Urban Blue Tits. *Front. Ecol. Evol.* **5**, 1–13 (2017).
